# Supplementary material
Source: PubMed Central journal article supplement (PMC5730454)

# Supplemental Figure 1

**A**

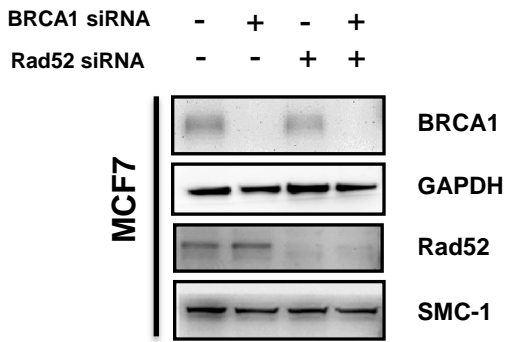

**B**

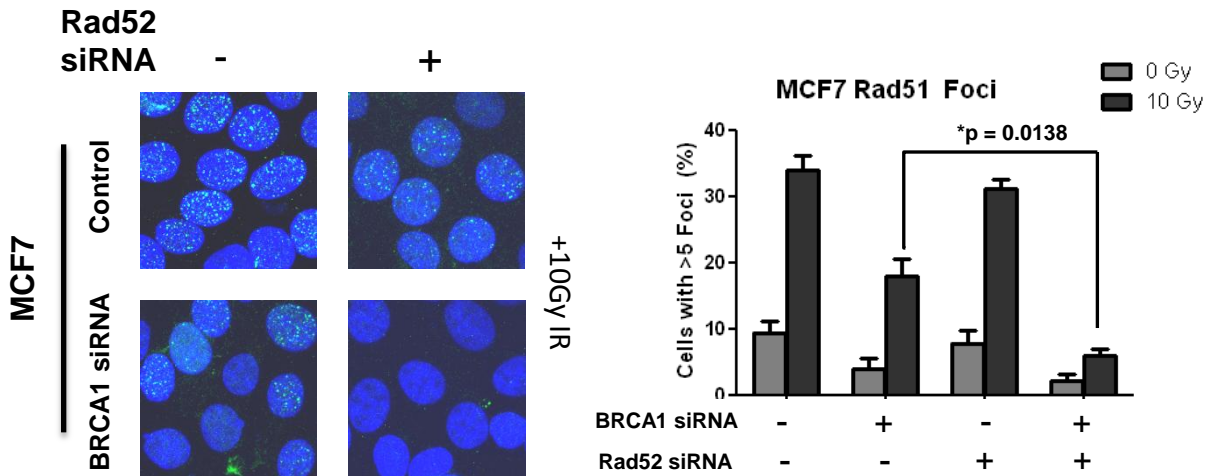

Supplement: NIHMS923526-supplement-Figure_1.pdf [file NIHMS923526-supplement-Figure_1.pdf]

# Supplemental Figure 2

**A**

**MCF7**

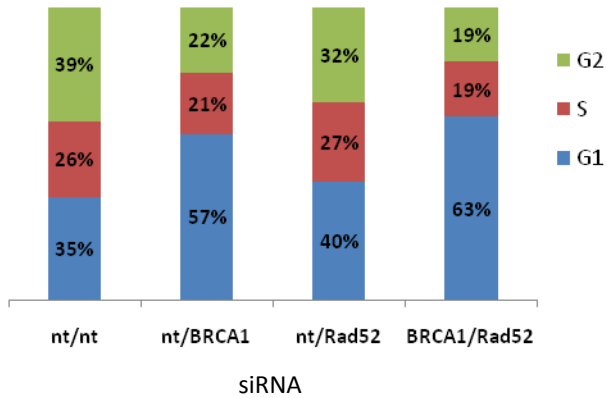

Rad52 siRNA

-

+

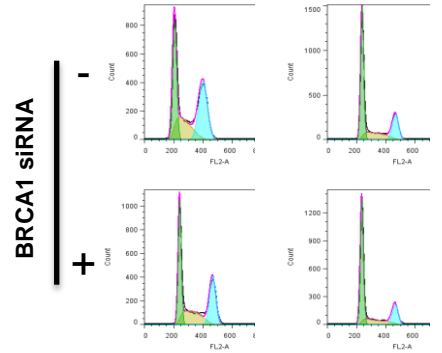

**H1299**

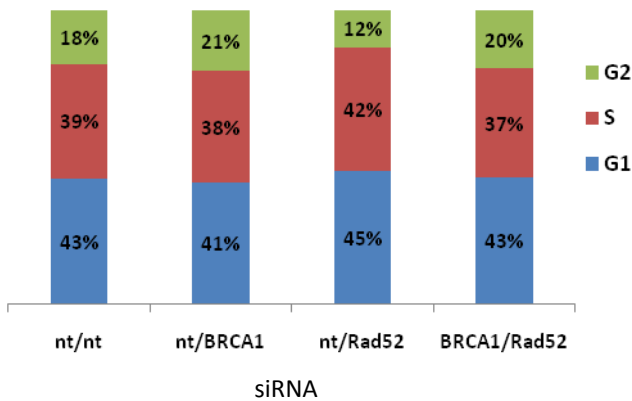

Rad52 siRNA

-

+

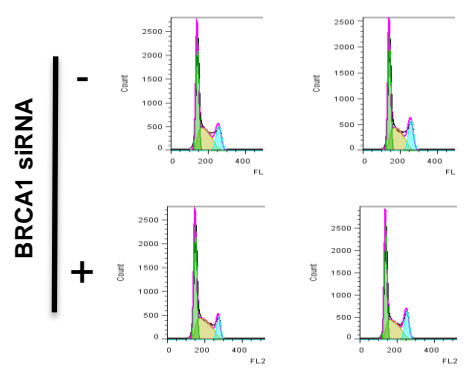

**B**

**MCF7**

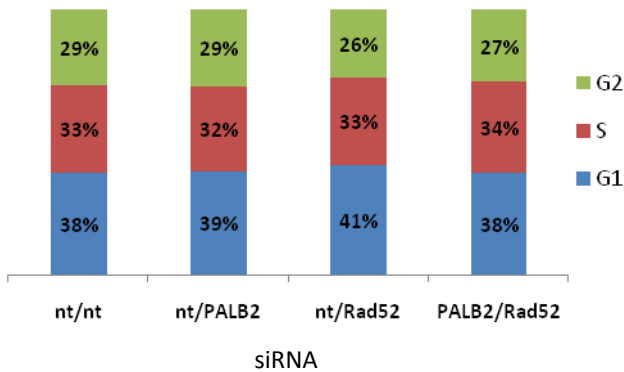

Rad52 siRNA

-

+

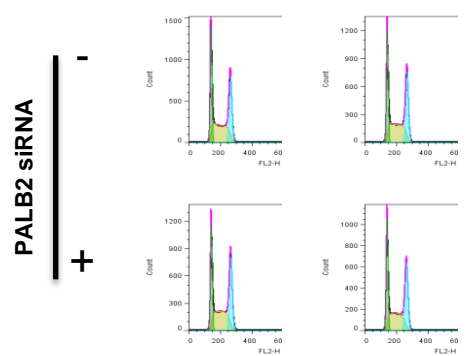

Supplement: NIHMS923526-supplement-Figure_2.pdf [file NIHMS923526-supplement-Figure_2.pdf]

# Supplemental Figure 3

**A**

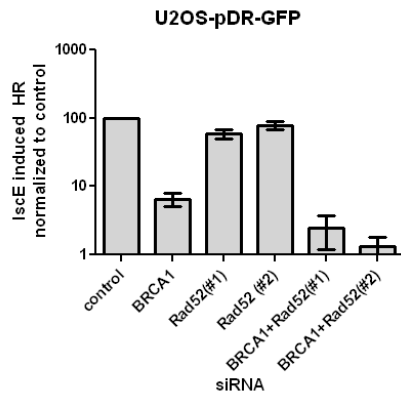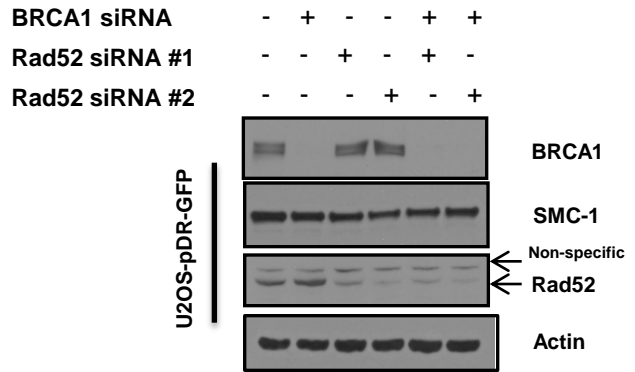

**B**

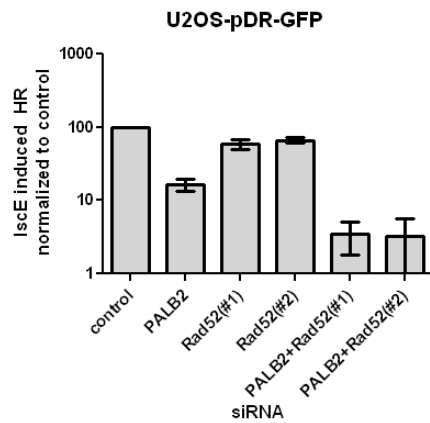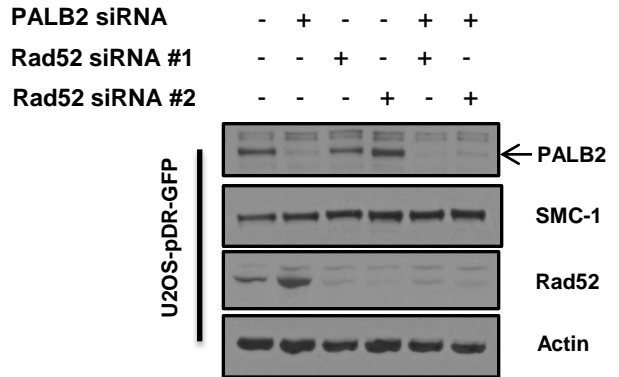

Supplement: NIHMS923526-supplement-Figure_3.pdf [file NIHMS923526-supplement-Figure_3.pdf]

# Supplemental Figure 4

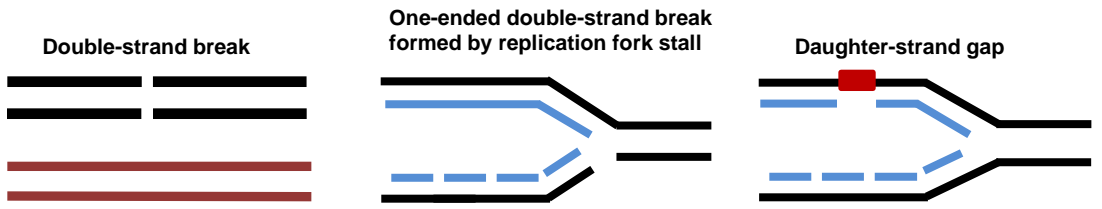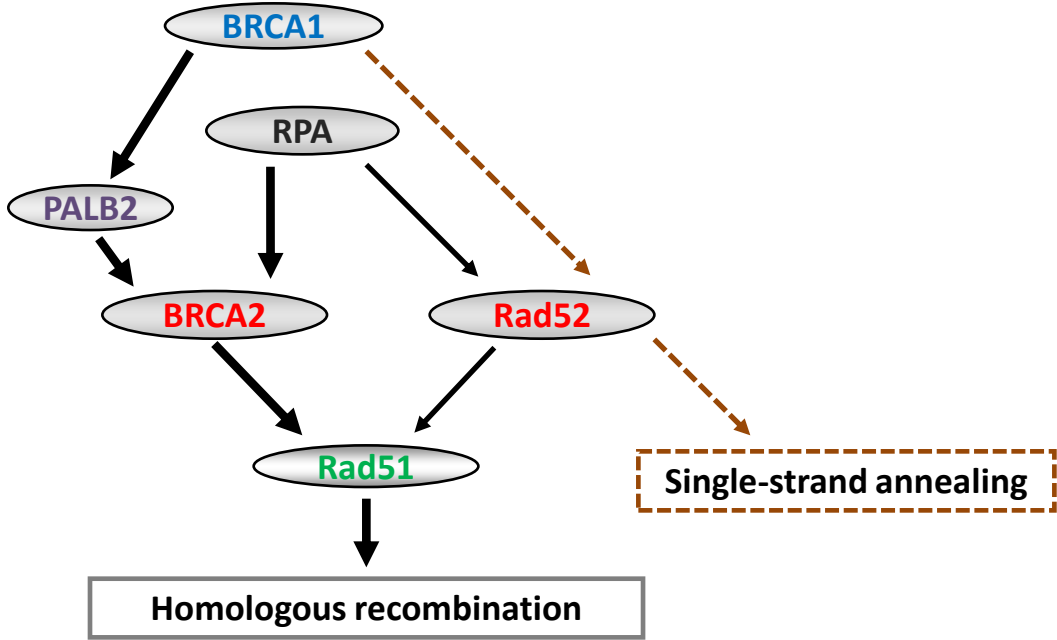

Supplement: NIHMS923526-supplement-Figure_4.pdf [file NIHMS923526-supplement-Figure_4.pdf]
